# Supplementary material for: Ionophore silica-coated magnetite nanoparticles as a recyclable heterogeneous catalyst for one-pot green synthesis of 2,4,5-trisubstituted imidazoles
Source: Royal Society of Chemistry journal article supplement (doi:10.1039/c5dt03488d), 2015-12-02
Supplement: c5dt03488d1.pdf [file c5dt03488d1.pdf]

## Supplementary Information

### Ionophore silica-coated magnetite nanoparticles as a recyclable heterogeneous catalyst for one-pot green synthesis of 2,4,5-trisubstituted imidazoles

Hossein Naeimi\* and Dorsa Aghaseyedkarimi

Department of Organic Chemistry, Faculty of Chemistry, University of Kashan, Kashan, 87317, I.R. Iran; Tel. No.: +98-361-5912388; Fax No.: +98-361-5912397

#### Copy of <sup>1</sup>H NMR, <sup>13</sup>C NMR & FT IR spectrums of the synthesized compounds:

#### Table of Contents

|                                                             |    |
|-------------------------------------------------------------|----|
| 2,4,5-triphenyl-1H-imidazole (2a).....                      | 2  |
| 2-(3-methoxy phenyl)-4,5-di phenyl-1H-imidazole (2b).....   | 3  |
| 2-(3,4-dimethoxyphenyl)-4,5-diphenyl-1H-imidazole (2c)..... | 4  |
| 2-(4-methoxy phenyl)-4,5-diphenyl-1H-imidazole (2d).....    | 4  |
| 2-(2,3-dimethoxyphenyl)-4,5-diphenyl-1H-imidazole (2e)..... | 6  |
| 2-(4-methylphenyl)-4,5-diphenyl-1H-imidazole (2f).....      | 7  |
| 2-(4,5-diphenyl-1H-imidazole-2-yl) phenol (2g).....         | 8  |
| 4-(4,5-diphenyl-1H-imidazole-2-yl) phenol (2h).....         | 9  |
| 2-(3-methylphenyl)-4,5-diphenyl-1H-imidazole (2i).....      | 10 |
| 2-(4-isopropyl phenyl)-4,5-diphenyl-1H-imidazole (2j).....  | 12 |
| 2-(2-chlorophenyl)-4,5-diphenyl-1H-imidazole (2k).....      | 13 |
| 2-(2,3-dichlorophenyl)-4,5-diphenyl-1H-imidazole (2l).....  | 15 |
| 2-(4-chlorophenyl)-4,5-diphenyl-1H-imidazole (2m).....      | 16 |
| 2-(2,4-dichlorophenyl)-4,5-diphenyl-1H-imidazole (2n).....  | 17 |

2,4,5-triphenyl-1H-imidazole (**2a**)

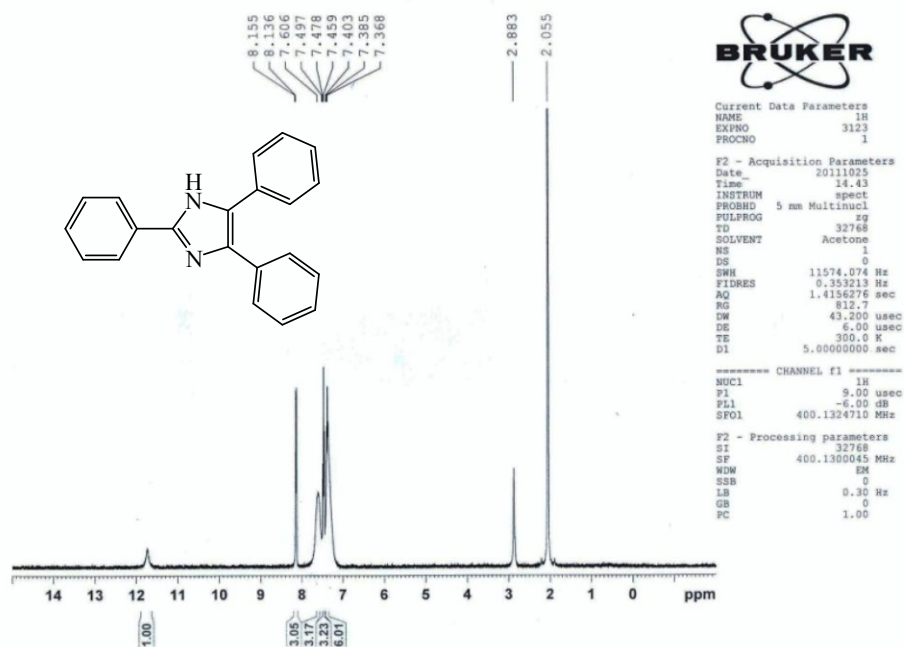

Figure 1. <sup>1</sup>H NMR spectrum of **2a**

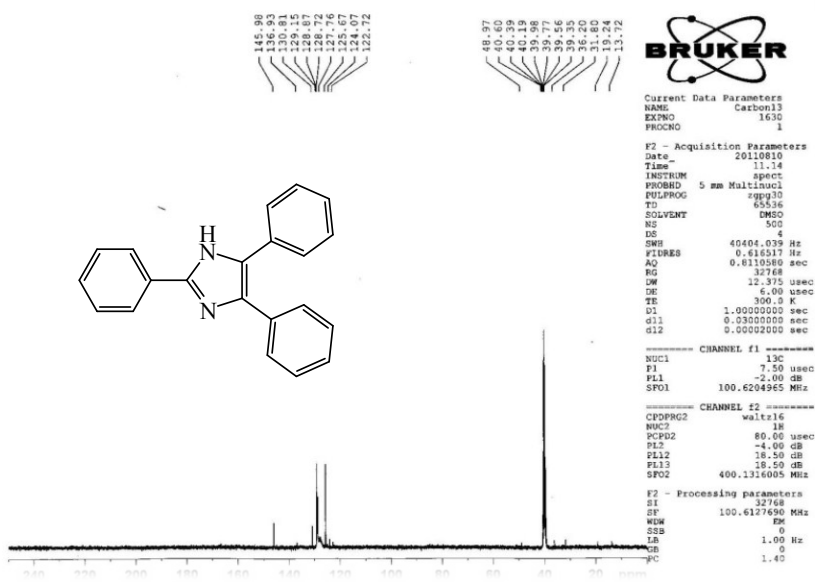

Figure 2. <sup>13</sup>C NMR spectrum of **2a**

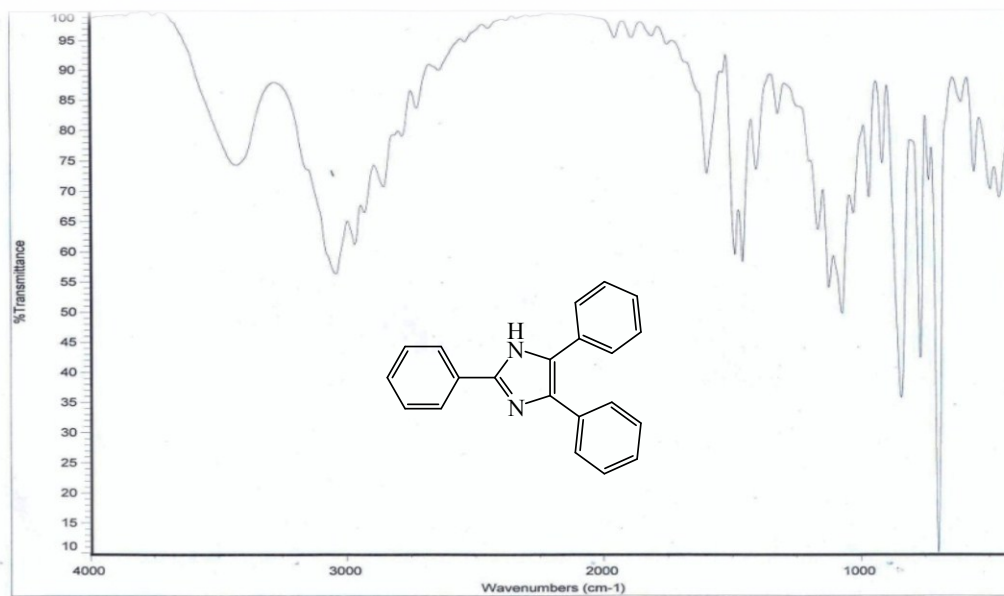

Figure 3. FT-IR spectrum of 2a

2-(3-methoxy phenyl)-4,5-di phenyl-1H-imidazole (**2b**)

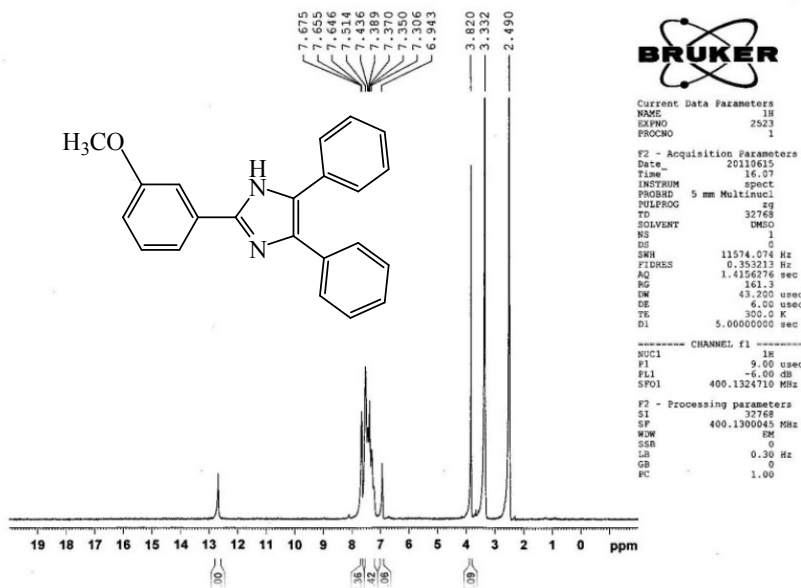

Figure 4. <sup>1</sup>H NMR spectrum of 2b

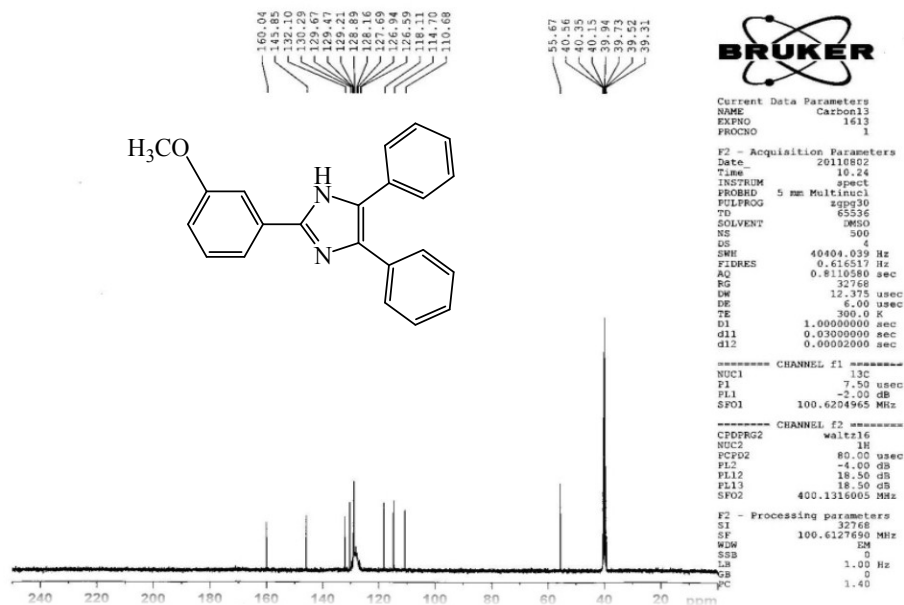

Figure 5. <sup>13</sup>C NMR spectrum of 2b

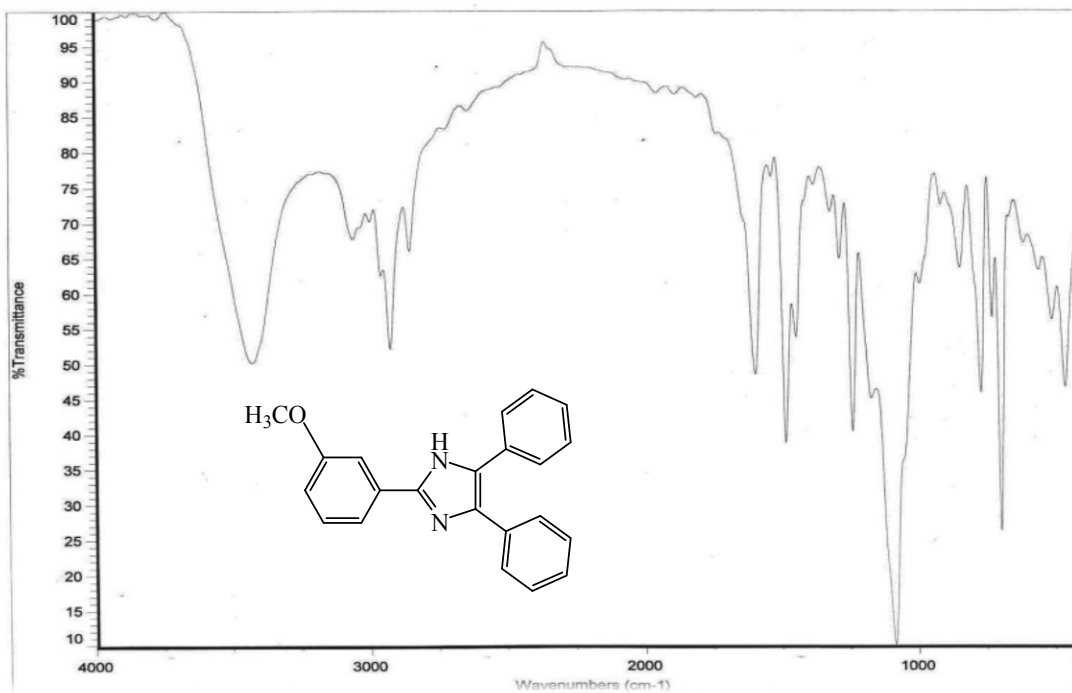

Figure 6. FT-IR spectrum of 2b

2-(3,4-dimethoxyphenyl)-4,5-diphenyl-1H-imidazole (**2c**)

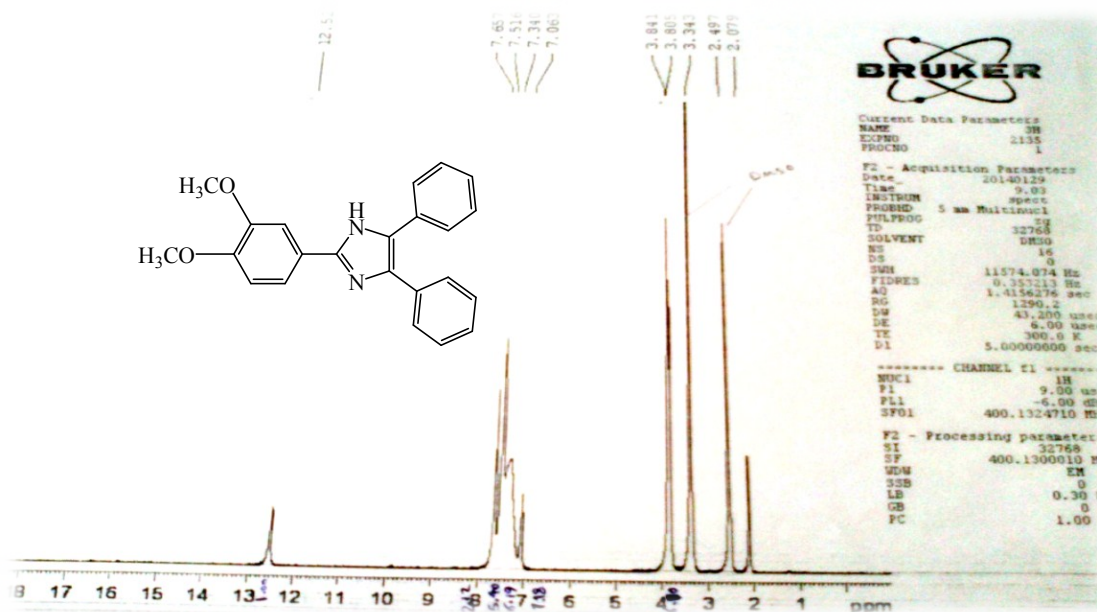

Figure 7. <sup>1</sup>H NMR spectrum of **2c**

2-(4-methoxy phenyl)-4,5-diphenyl-1H-imidazole (**2d**)

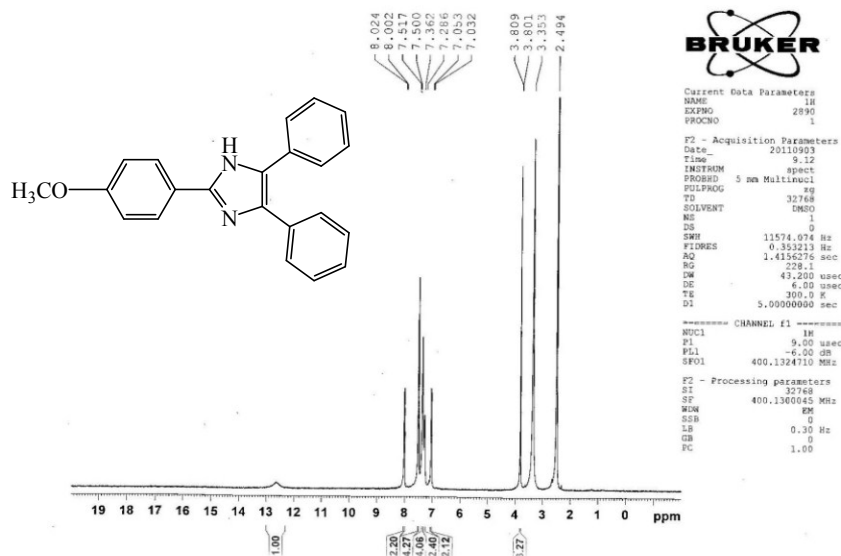

Figure 8. <sup>1</sup>H NMR spectrum of **2d**

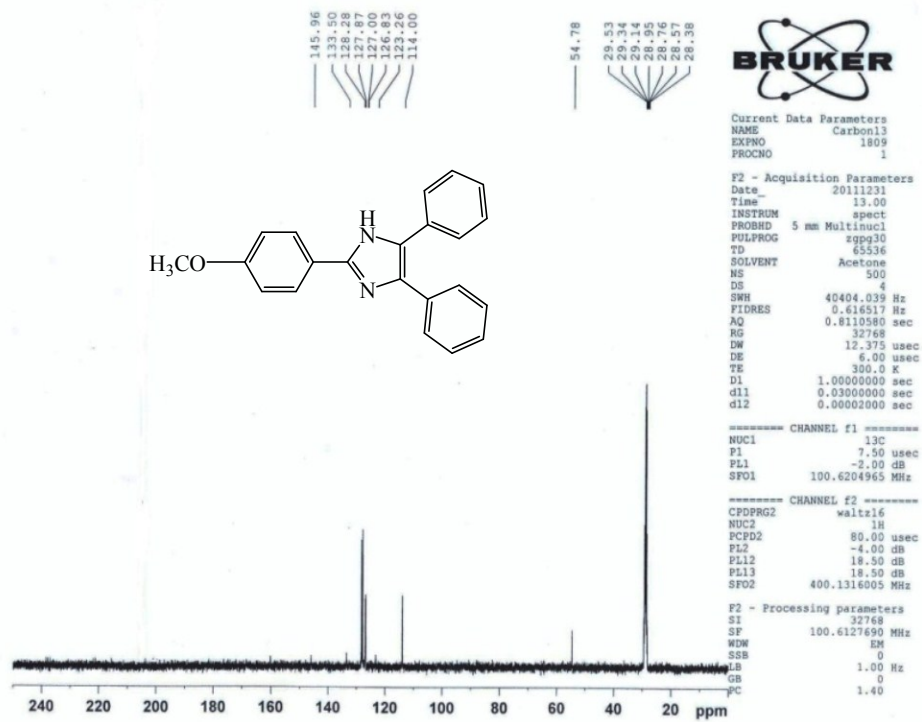

Figure 9. <sup>13</sup>CNMR of 2d

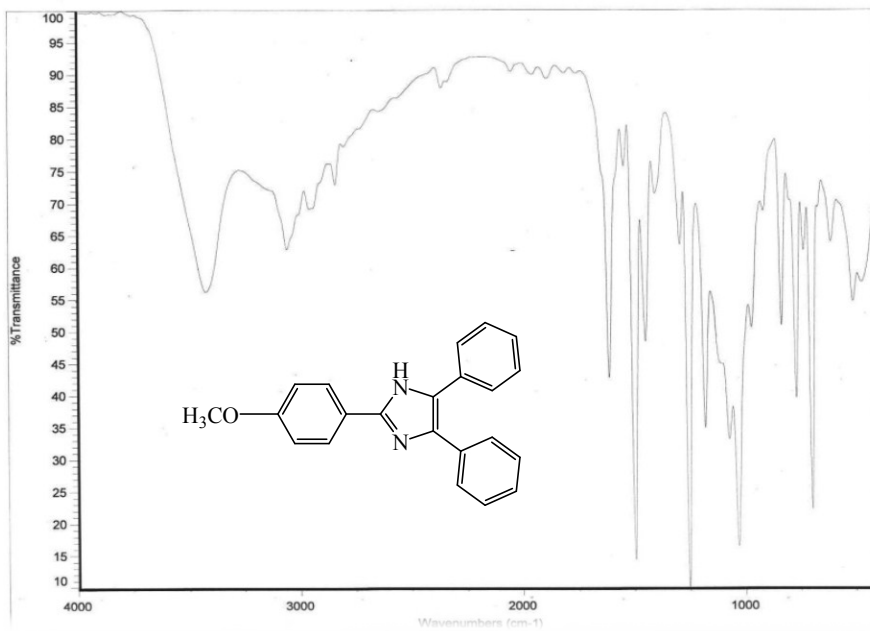

Figure 10. FT IR spectrum of 2d

2-(2,3-dimethoxyphenyl)-4,5-diphenyl-1H-imidazole (2e)

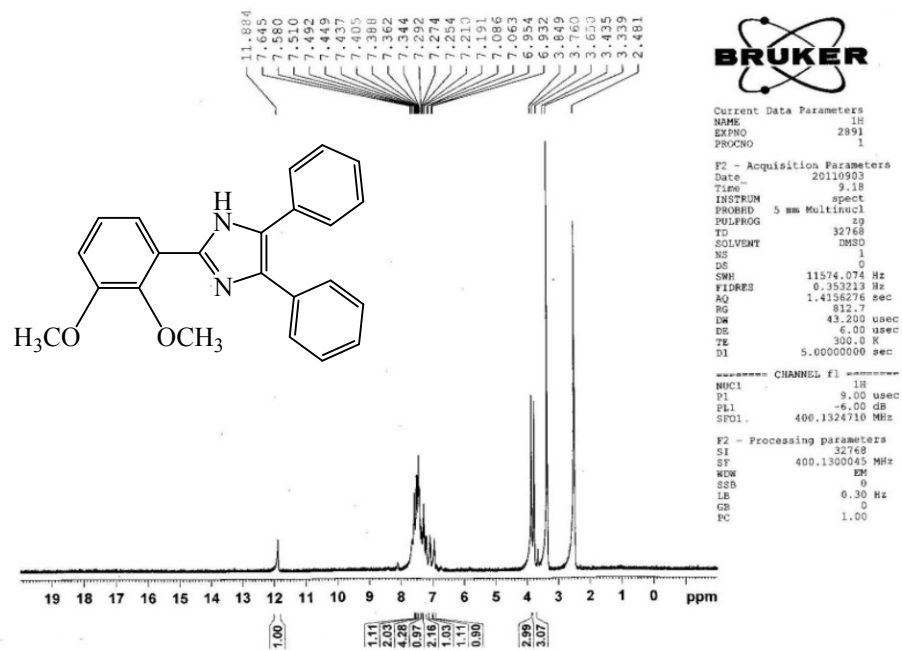

Figure 11. <sup>1</sup>H NMR spectrum of 2e

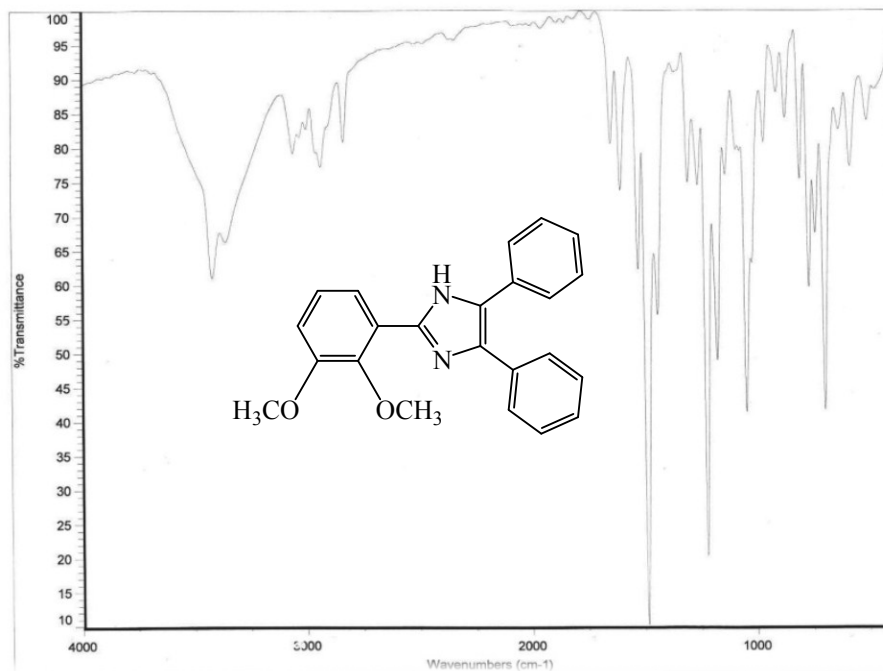

Figure 12. FT IR spectrum of 2e

2-(4-methylphenyl)-4,5-diphenyl-1H-imidazole (2f)

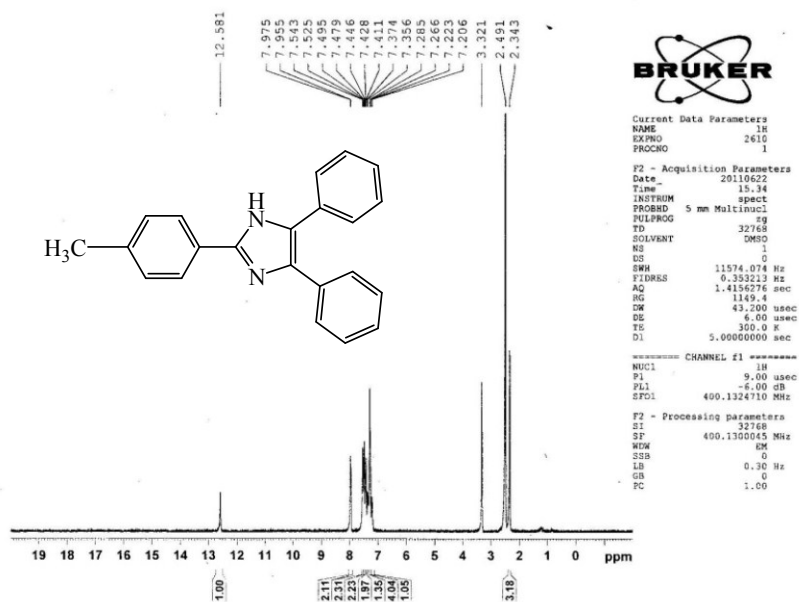

Figure 13. <sup>1</sup>H NMR spectrum of 2f

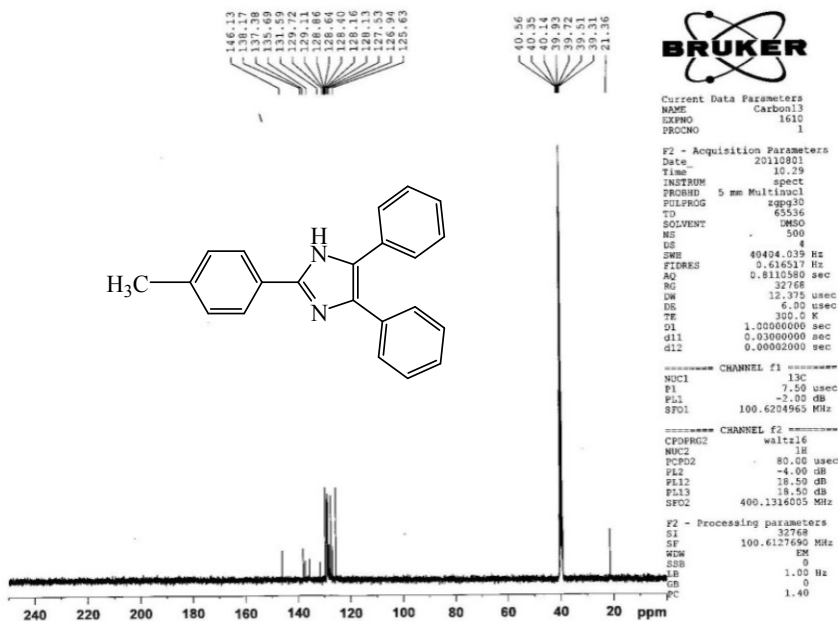

Figure 14. <sup>13</sup>C NMR of 2f



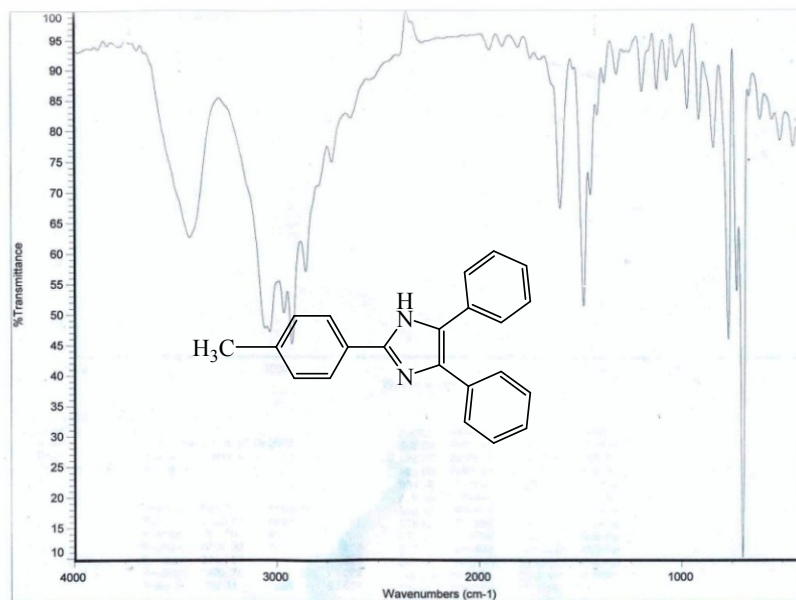

Figure 15. FT IR spectrum of 2f

2-(4,5-diphenyl-1H-imidazole-2-yl) phenol (**2g**)

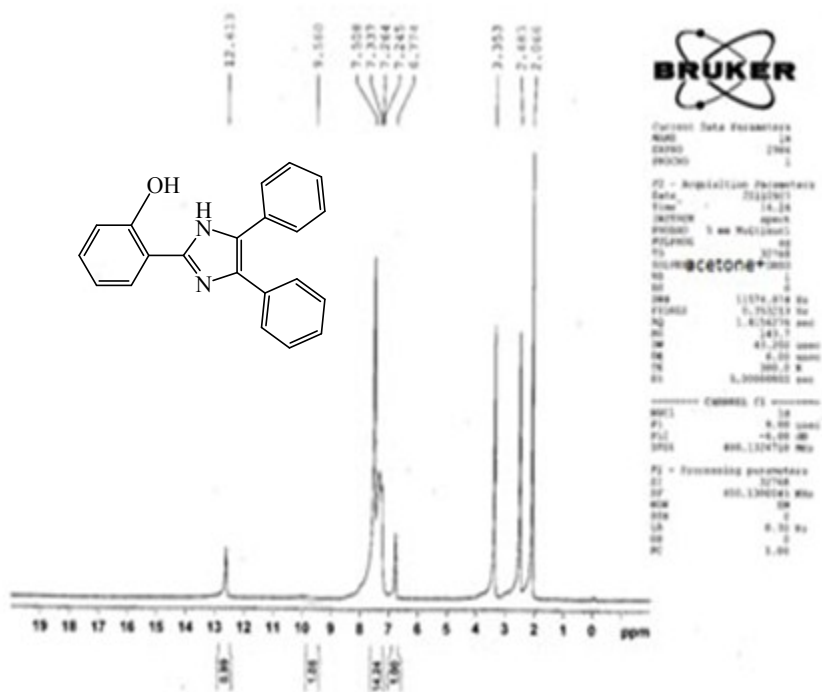

Figure 16. <sup>1</sup>H NMR spectrum of 2g

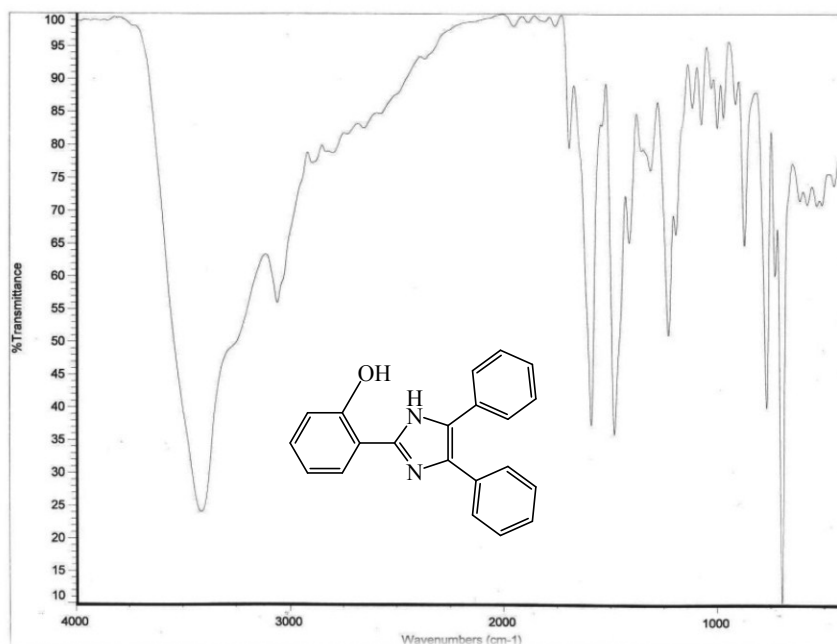

Figure 17. FT IR spectrum of 2g

4-(4,5-diphenyl-1H-imidazole-2-yl) phenol (**2h**)

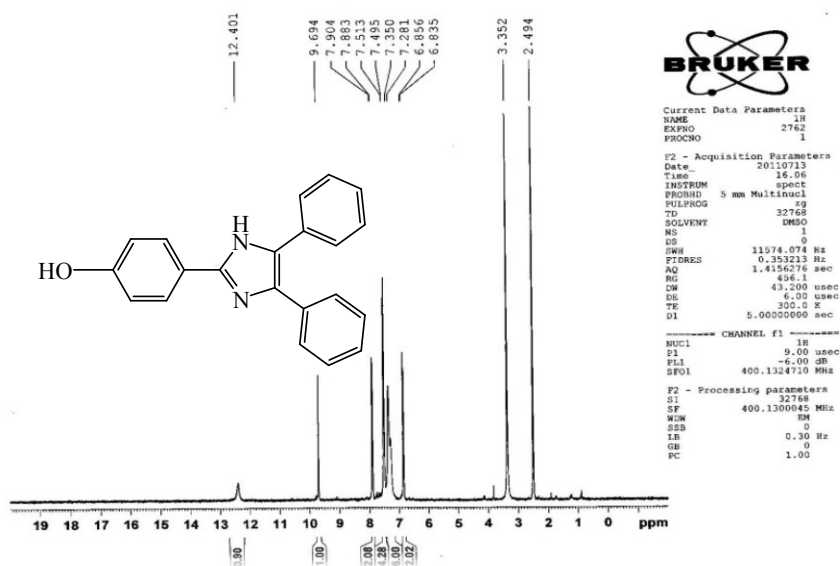

Figure 18. <sup>1</sup>H NMR spectrum of 2h

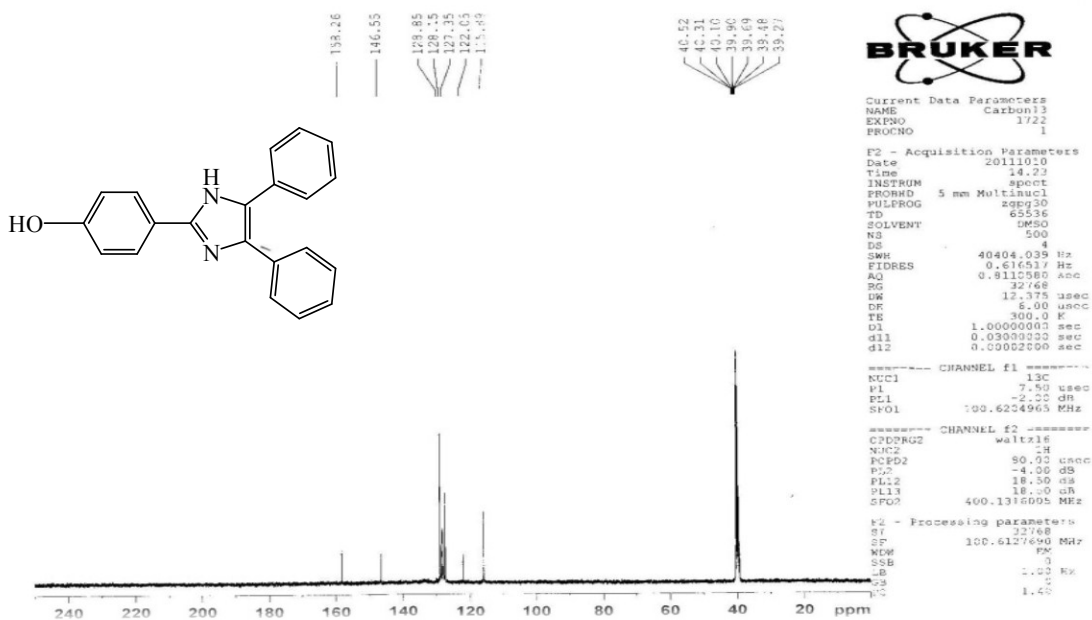

Figure 19. <sup>13</sup>CNMR spectrum of 2h

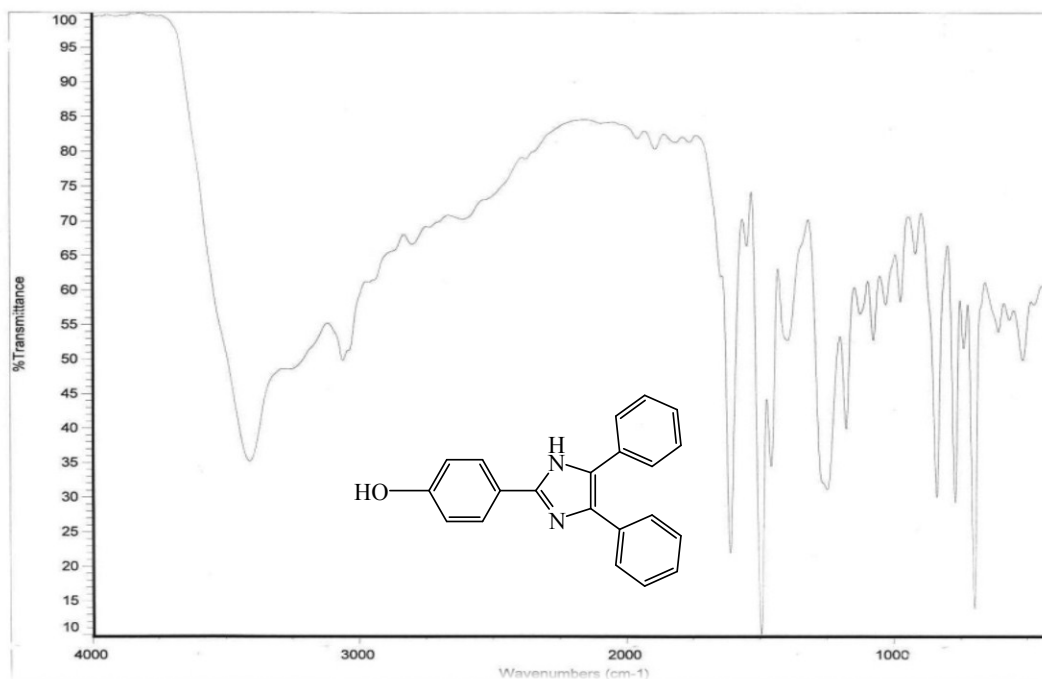

Figure 20. IR spectrum of 2h



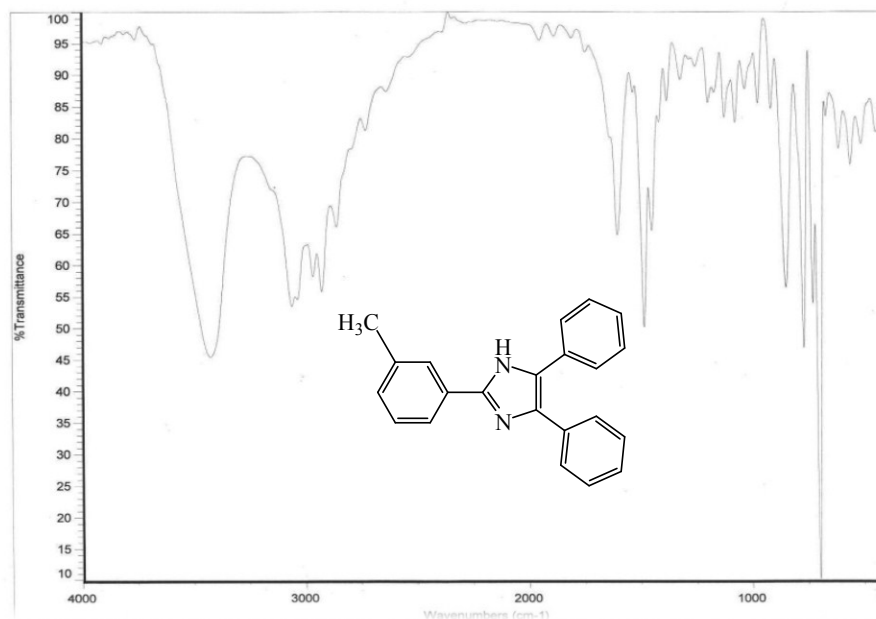

Figure 23. FT IR spectrum of 2i

2-(4-isopropyl phenyl)-4,5-diphenyl-1H-imidazole (2j)

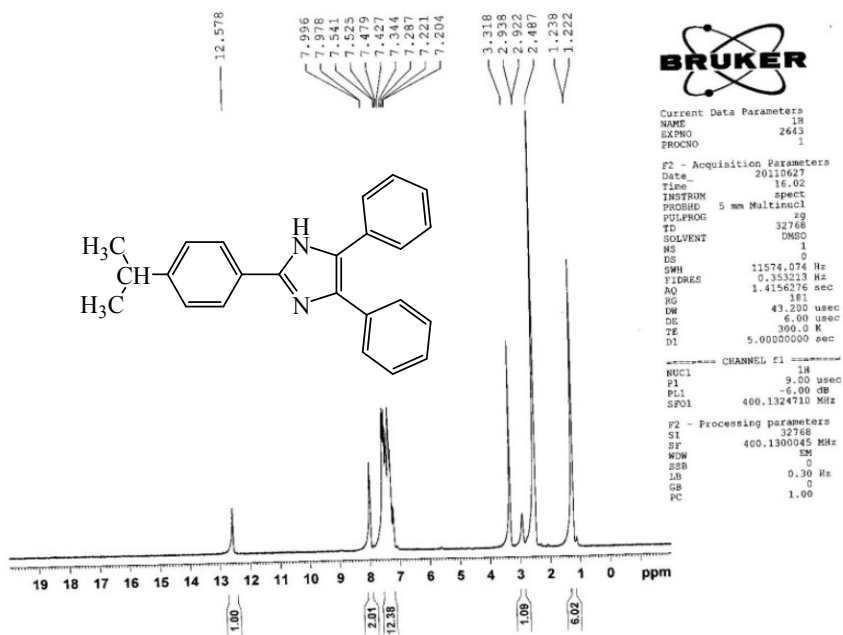

Figure 24. <sup>1</sup>H NMR spectrum of 2j

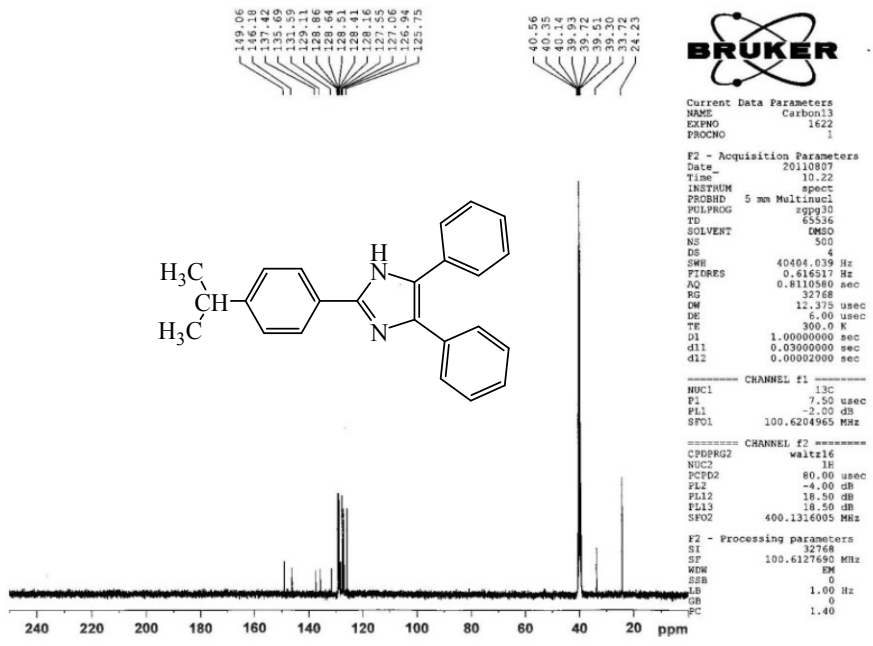

Figure 25. <sup>13</sup>CNMR spectrum of 2j

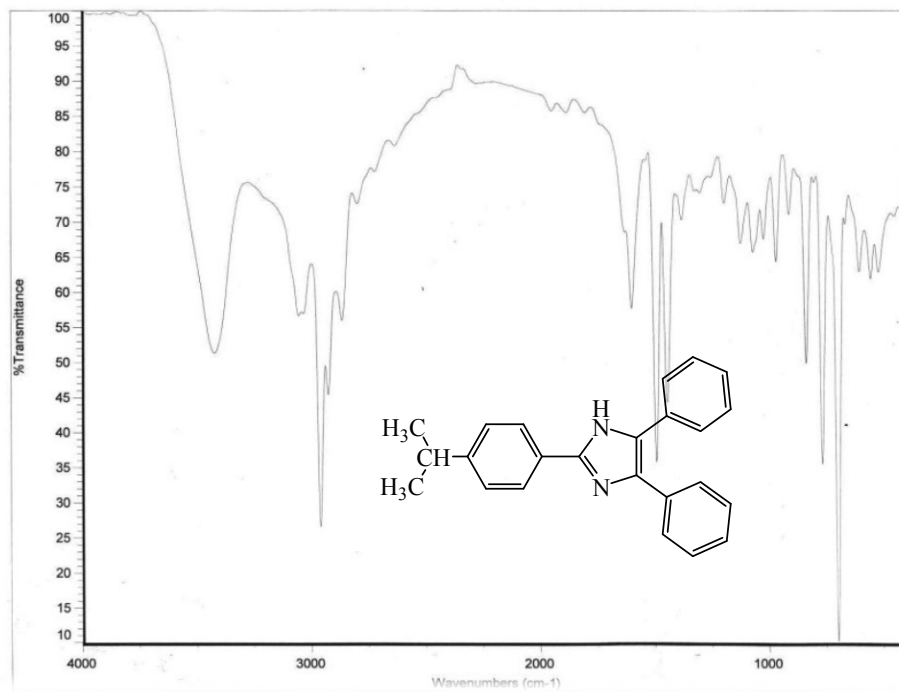

Figure 26. FT IR spectrum of 2j

2-(2-chlorophenyl)-4,5-diphenyl-1H-imidazole (2k)

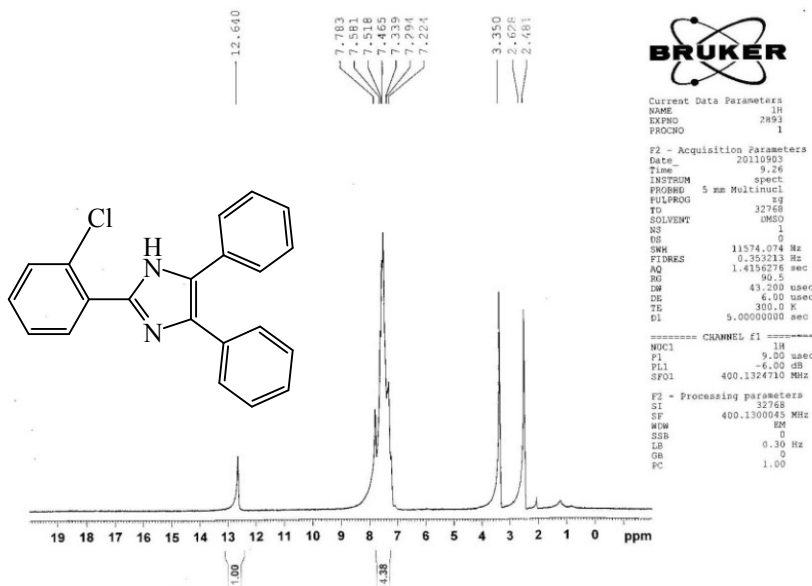

Figure 27. <sup>1</sup>H NMR spectrum of 2k

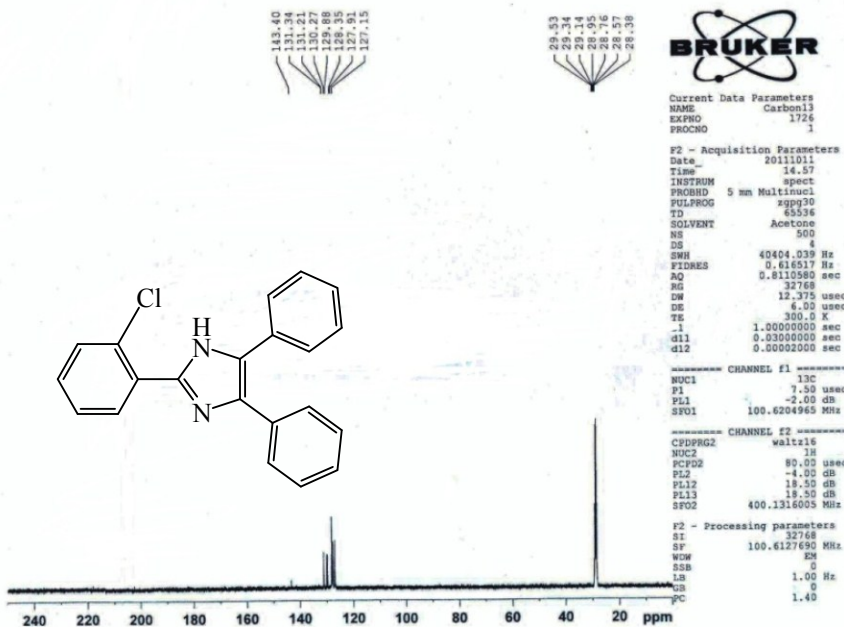

Figure 28. <sup>13</sup>C NMR spectrum of 2k

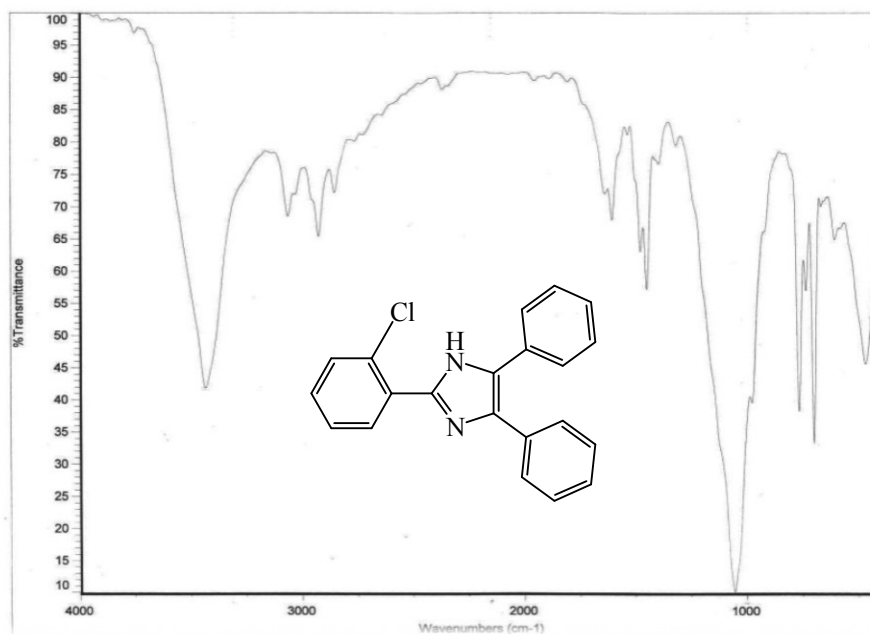

Figure 29. FT IR spectrum of 2k

2-(2,3-dichlorophenyl)-4,5-diphenyl-1H-imidazole (2l)

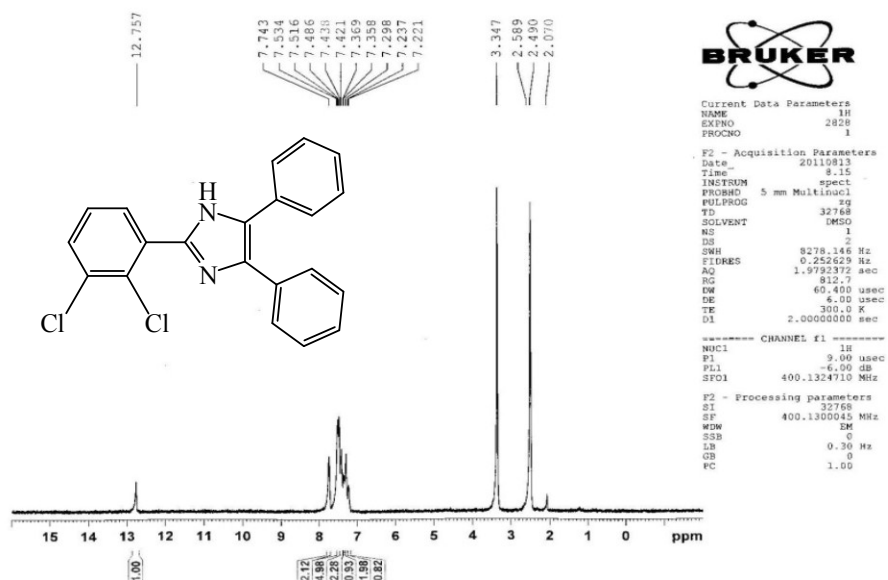

Figure 30. <sup>1</sup>H NMR spectrum of 2l



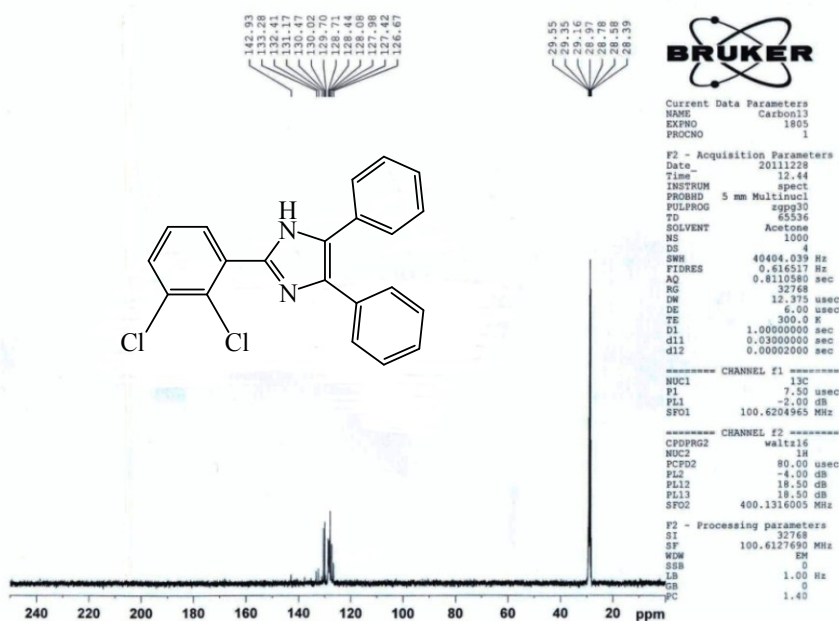

Figure 31. <sup>13</sup>CNMR spectrum of 2I

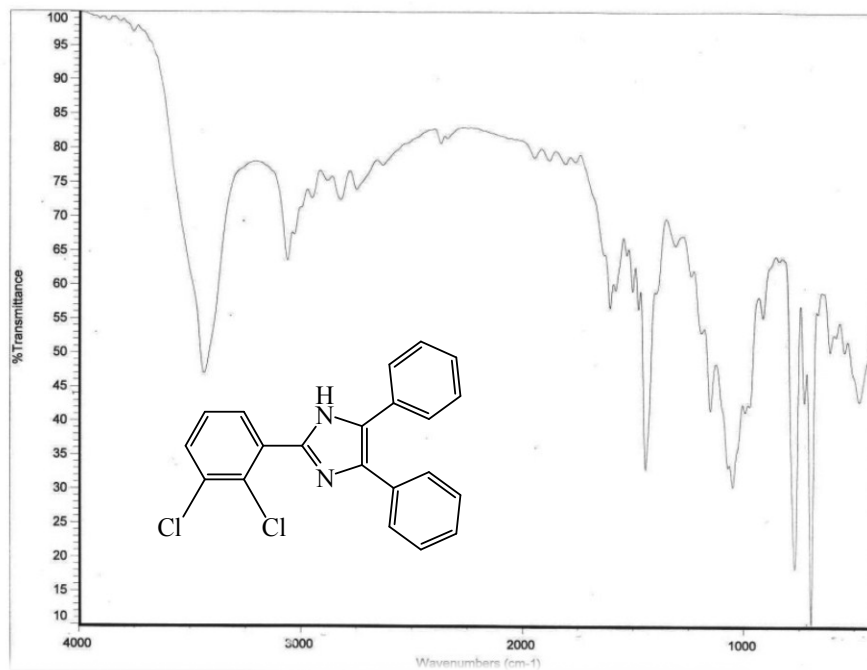

Figure 32. FT IR spectrum of 2I

2-(4-chlorophenyl)-4,5-diphenyl-1H-imidazole (**2m**)

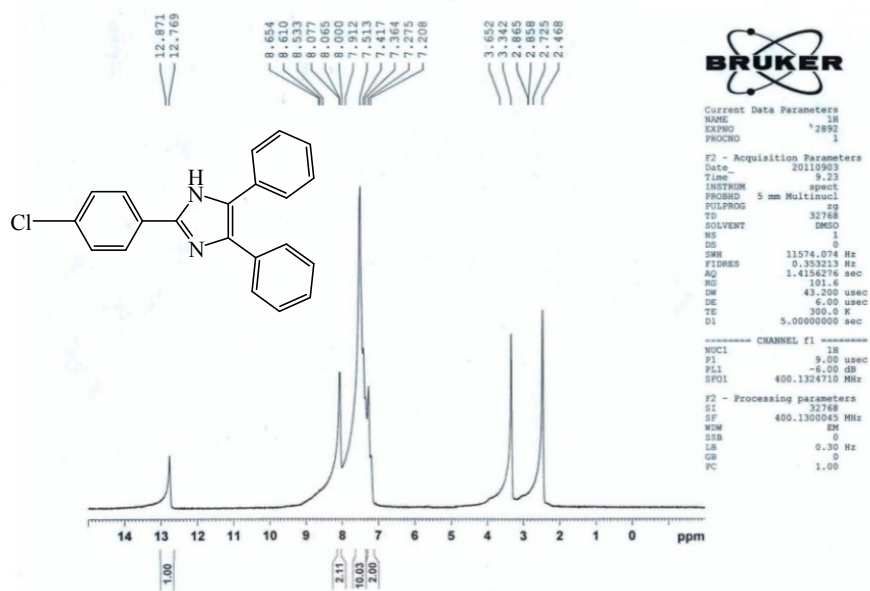

Figure 33. <sup>1</sup>H NMR spectrum of **2m**

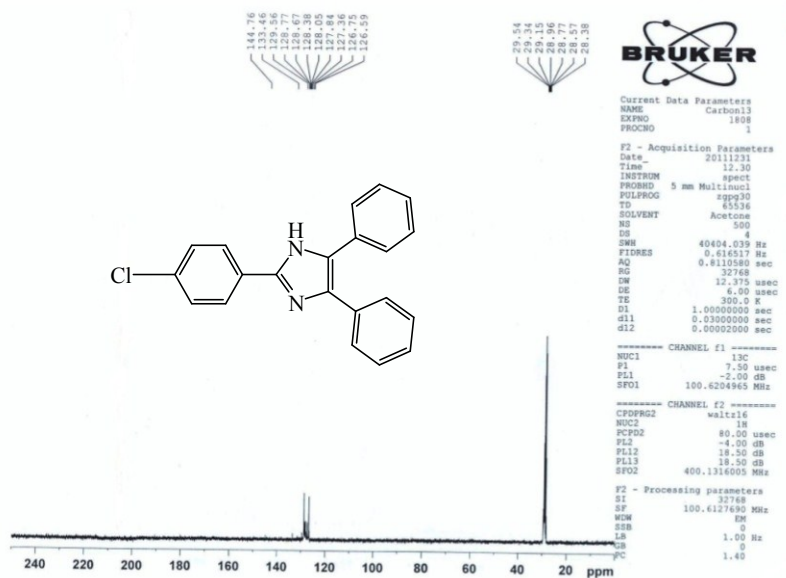

Figure 34. <sup>13</sup>C NMR spectrum of **2m**

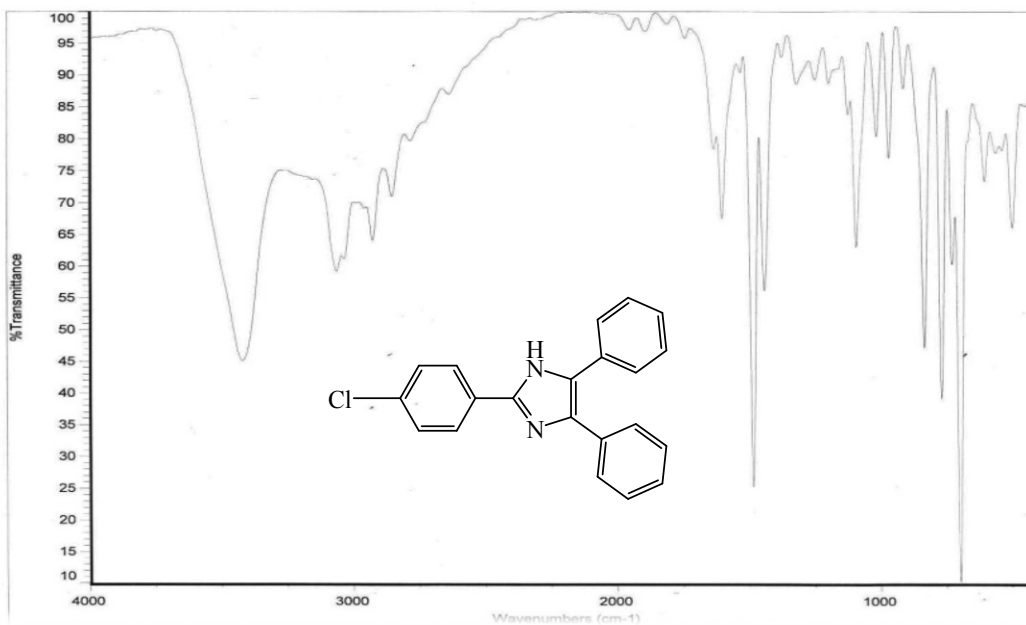

Figure 35. FT-IR spectrum of 2m

2-(2,4-dichlorophenyl)-4,5-diphenyl-1H-imidazole (2n)

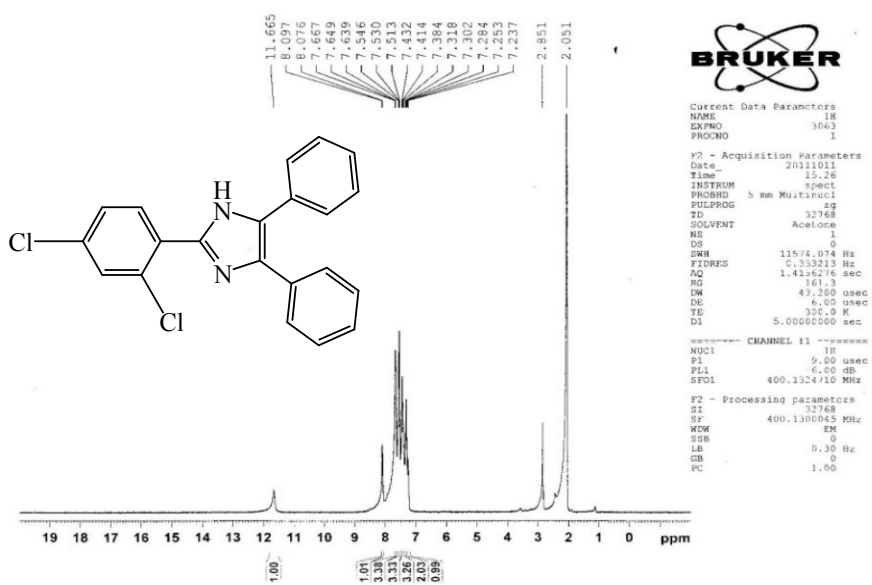

Figure 36. <sup>1</sup>H NMR spectrum of 2n
